# Supplementary material
Source: PubMed Central journal article supplement (PMC5453706)
Supplement: jciinsight-2-91487-s001.pdf [file jciinsight-2-91487-s001.pdf]

# **CXCL13-producing T<sub>FH</sub> cells link immune suppression and adaptive memory in human breast cancer**

Chunyan Gu-Trantien, Edoardo Migliori, Laurence Buisseret, Alexandre de Wind, Sylvain Brohée, Soizic Garaud, Grégory Noël, Vu Luan Dang Chi, Jean-Nicolas Lodewyckx, Céline Naveaux, Hugues Duvillier, Stanislas Goriely, Denis Larsimont and Karen Willard-Gallo

**Supplemental Methods**

**&**

**Supplemental Figures**

## Supplemental Methods

### ***Patient population and clinical samples***

Tumor and blood samples were obtained from patients who underwent surgical resection for BC or benign breast tumors at the Institut Jules Bordet. Fresh tonsils ( $n = 10$ ) and mammary reduction tissues ( $n = 5$ ) were obtained from CHU Saint-Pierre. Prospectively collected fresh tumor tissues ( $n = 42$ ; Table S3) and peripheral blood (PB;  $n = 9$ ; Table S3) from BC patients were immediately analyzed by flow cytometry *ex vivo*. PB samples from 5 healthy female adults were used as controls or for CXCL13 induction experiments. Formalin-fixed paraffin embedded (FFPE) tumor tissues from 60 BC patients were used for survival analysis (retrospective set; whole genome gene expression microarray data available in Dedeurwaerder *et al.*, 2011)(Table S1). These samples were analyzed by quantitative PCR (qPCR) and IHC. In addition, FFPE tumor tissues from 10 BC patients were immunofluorescent (IF)- and IHC-stained.

### ***Flow cytometry***

Tissue fragments from fresh surgical specimens were processed as previously described (Garaud *et al.*, 2014; Gu-Trantien *et al.*, 2013). Briefly, dissected tissues were directly transferred into 3 ml of X-VIVO 20 (Lonza) before two 30s rounds of mechanical dissociation with the GentleMACS™ Dissociator (Program A.01; Miltenyi Biotec). The resulting cell suspension was filtered following each dissociator run using a 40  $\mu$ m cell strainer (BD Falcon), washed with X-VIVO 20, centrifuged 15 min at 600 g and resuspended in X-VIVO 20 before flow cytometric analysis or cell sorting. For flow cytometric analysis, samples were surface stained for 35 min at 4 °C followed by dead cell staining using Fixable Viability Dye (eBioscience) before intracellular staining with FoxP3 Staining Buffer Set (eBioscience). For control D-PB and P-PB, surface staining was performed in 100  $\mu$ l of fresh whole blood followed by downstream steps as above without using red blood cell lysis reagents. CXCL13 staining was performed directly *ex vivo* without using Golgi-stop reagents and the entire staining procedure was completed within 6-hours of tumor resection. Brefeldin A (BD Biosciences; see **In vitro stimulation** below) was added for experiments where IFN $\gamma$  was detected. Ab used are listed in the table below. Data were acquired on a Navios Flow Cytometer and analyzed using Kaluza (Beckman Coulter) and FlowJo softwares. B cell subpopulations are determined using criteria in Bohnhorst *et*

*al.*, 2001, Green *et al.*, 2012, Perez-Andres *et al.*, 2010 and Zirakzadeh *et al.* 2013.

| Ab used for flow cytometric analysis |         |                   |             |          |
|--------------------------------------|---------|-------------------|-------------|----------|
| Name                                 | Color   | Company           | Reference   | Clone    |
| BCL6                                 | PE      | BD Biosciences    | 561522      | K112-91  |
| CCR7                                 | AC7     | Biolegend         | 353211      | G043H7   |
| CCR7                                 | BV510   | Biolegend         | 353231      | G043H7   |
| CD3                                  | VioBlue | Miltenyi Biotec   | 130-094-363 | BW264/56 |
| CD4                                  | AF700   | eBioscience       | 56-0049     | RPA-T4   |
| CD8                                  | BV510   | BD Biosciences    | 563919      | SK1      |
| CD19                                 | APC     | R&D Systems       | FAB4867A    | 4G7-2E3  |
| CD25                                 | PF710   | eBioscience       | 46-0257     | CD25-4E3 |
| CD27                                 | PC7     | Beckman Coulter   | A54823      | 1A4CD27  |
| CD38                                 | PF710   | eBioscience       | 46-0388     | HB7      |
| CD45RA                               | PTR     | Life Technologies | MHCD45RA17  | MEM-56   |
| CD56                                 | PE      | eBioscience       | 12-0567     | CMSSB    |
| CD200                                | PE      | Biolegend         | 329206      | OX-104   |
| CTLA-4                               | PE      | BD Biosciences    | 555853      | BNI3     |
| CTLA-4                               | BV421   | BD Biosciences    | 562743      | BNI3     |
| CXCL13                               | APC     | R&D Systems       | IC801A      | 53610    |
| CXCR5                                | PE      | R&D Systems       | FAB190P     | 51505    |
| CXCR5                                | PF610   | eBioscience       | 61-9185     | MU5UBEE  |
| CXCR5                                | BV421   | BD Biosciences    | 562747      | RF8B2    |
| Fixable Viability Dye                | eF780   | eBioscience       | 65-0865     |          |
| FoxP3                                | PF610   | eBioscience       | 61-4776     | PCH101   |
| FoxP3                                | PC5.5   | eBioscience       | 45-4776     | PCH101   |
| ICOS                                 | PC7     | eBioscience       | 25-9948     | ISA-3    |
| IFN $\gamma$                         | PE      | eBioscience       | 12-7319     | 4S.B3    |
| IFN $\gamma$                         | PC7     | BD Biosciences    | 557643      | B27      |
| IgD                                  | PE      | Miltenyi Biotec   | 130-094-539 | IgD26    |
| Ki67                                 | FITC    | eBioscience       | 11-5699     | 20Raj1   |
| Ki67                                 | PF710   | eBioscience       | 46-5699     | 20Raj1   |
| PD-1                                 | FITC    | eBioscience       | 11-9969     | MIH4     |
| PD-1                                 | PF710   | eBioscience       | 46-9969     | MIH4     |
| T-bet                                | BV421   | BD Biosciences    | 563318      | O4-46    |
| TIGIT                                | PF710   | eBioscience       | 46-9500     | MBSA43   |

### ***IHC and Immunofluorescence***

FFPE sections (4  $\mu$ m) from available tumor tissues were deparaffinized and demasked prior to Ab labeling. Ab are listed in the table below. FFPE tumor blocs from 60 patients of the retrospective set (Table S1) were labeled with  $\alpha$ CD20 ( $n = 51$ ),  $\alpha$ CD23 or  $\alpha$ CD45 Ab. Four select tumors from the prospective patient set (Table S3) were dual-labeled with  $\alpha$ CD3/ $\alpha$ CD20 or with  $\alpha$ CD4/ $\alpha$ CD8. IHC Ab staining on full-face sections was performed using the iVIEW DAB Detection Kit and a BenchMark XT IHC/ISH automated slide stainer (Discovery XT, Tucson, USA). Slides were read by 2 trained pathologists. IHC images were acquired at Lens 20x with a Nanozoomer 2.0-RS Digital slide scanner (Hamamatsu) and analyzed using NDP.view2 software. These methods were standardized as described in Buisseret *et al.*, *in press*.

FFPE blocs from 10 BC tumors and 4 tonsils were analyzed using IF. Mounted sections were deparaffinized with xylene, pretreated with citrate 10 mM, pH 6.0 at 95 °C for 30 min, blocked with 1% BSA for 30 min prior to incubation with a mixture of 3 primary Ab including  $\alpha$ CXCL13 in a moist chamber at 4 °C overnight. After washing, a mixture of 3 secondary Ab was added for 2-hours at room temperature followed by mounting in a Prolong Gold Antifade Reagent with DAPI (Life Technologies). Slides were analyzed using a Zeiss 710 confocal microscope (Carl Zeiss). Images were acquired at 20X Magnification and analyzed using ZEN software. Two different magnifications from the same original images are presented for each boxed region shown in the Figures.

| <b>Ab used for IHC staining</b>          |            |             |            |        |               |
|------------------------------------------|------------|-------------|------------|--------|---------------|
| Antigens                                 | Dilution   | Company     | Reference  | Host   | Clone         |
| CD3                                      | prediluted | Dako        | IR503      | Rabbit | polyclonal    |
| CD4                                      | prediluted | BioSB       | BSB5150    | Rabbit | RBT-CD4       |
| CD8                                      | prediluted | Dako        | IR623      | Mouse  | C8/144B       |
| CD20                                     | prediluted | Dako        | IR604      | Mouse  | L26           |
| CD23                                     | prediluted | Ventana     | 790-4408   | Rabbit | SP23          |
| CD45                                     | prediluted | Dako        | IR751      | Mouse  | 2B11 + PD7/26 |
| <b>Primary Ab used for IF staining</b>   |            |             |            |        |               |
| Antigens                                 | Dilution   | Company     | Reference  | Host   | Clone         |
| CD3                                      | prediluted | Dako        | IS503      | Rabbit | polyclonal    |
| CD4                                      | 1/50       | Cell Marque | 104R-14    | Rabbit | SP35          |
| CD8                                      | 1/50       | Thermo      | RM-9116-S1 | Rabbit | SP16          |
| CD20                                     | 1/50       | Abcam       | ab9475     | Mouse  | L26           |
| CD21                                     | 1/500      | Abcam       | ab75985    | Rabbit | EP3093        |
| CXCL13                                   | 1/200      | R&D Systems | AF801      | Goat   | polyclonal    |
| IFN- $\gamma$                            | 1/100      | R&D Systems | MAB2851    | Mouse  | 25723         |
| IgA                                      | 1/100      | Cell Marque | 267A-14    | Rabbit | polyclonal    |
| IgG                                      | 1/100      | Cell Marque | 269A-14    | Rabbit | polyclonal    |
| Ki67                                     | 1/50       | Abcam       | ab16667    | Rabbit | SP6           |
| T-bet                                    | 1/400      | R&D Systems | MAB5385    | Mouse  | 525803        |
| <b>Secondary Ab used for IF staining</b> |            |             |            |        |               |
| Antigens                                 | Dilution   | Company     | Reference  | Host   | Reactivity    |
| DyLight 488                              | 1/200      | Abcam       | ab98514    | Donkey | Goat          |
| DyLight 550                              | 1/200      | Abcam       | ab98767    | Donkey | Mouse         |
| DyLight 650                              | 1/200      | Abcam       | ab98491    | Donkey | Rabbit        |

### ***Cell sorting and isolation***

For molecular analyses, CD4<sup>+</sup> T cell subpopulations were sorted using a MoFlo Astrios Cell Sorter (Beckman Coulter) from 5 tonsils (mononuclear cells frozen in DMSO) and 1 fresh BC homogenate. The cell purification protocols were controlled by flow cytometry with >95% purity observed. Total CD4<sup>+</sup> TIL were positively purified from 21 fresh BC homogenates using Dynabeads CD4 (Life Technologies) with the remaining non-CD4 cells also included for analysis (Gu-Trantien *et al.*, 2013).

## Quantitative PCR

RNA was extracted using RNeasy FFPE kit (Qiagen) or TRIzol Reagent (Invitrogen) for FFPE samples and sorted cells, respectively, before reverse transcription to cDNA using High Capacity RNA-to-cDNA kit (Life Technologies). Dr. Christos Sotiriou and his group, Breast Cancer Translational Research Laboratory, Institut Jules Bordet, Brussels, Belgium, kindly provided cDNA samples from some patients in the retrospective series (Table S1; Dedeurwaerder *et al.*, 2011). FFPE samples were preamplified using Taqman PreAmp Master Mix (Life Technologies) before real-time PCR reactions using commercially available Gene Expression Assays (listed in the table below) and TaqMan Universal Master Mix II with UNG (Life Technologies). Sorted cells were analyzed without preamplification using the same primers as previously described (Gu-Trantien *et al.*, 2013; in the table below) and iTaq SYBR Green Supermix with ROX (Bio-Rad). PCR reactions were run on a 7900HT Fast Real-Time PCR System (Life Technologies). House-keeping genes included: *POLR2A*, *TBP* and *TMBIM4* for FFPE samples, *SDHA*, *TBP* and *TMBIM4* for CD4-depleted fresh BC cells or *CASC3* for purified CD4<sup>+</sup> T cell and subpopulations.

| Taqman Gene Expression Assays used for FFPE samples      |                          |                            |                      |
|----------------------------------------------------------|--------------------------|----------------------------|----------------------|
| Gene Name                                                | Company                  | Assay ID                   | Amplicon Length (bp) |
| <i>POLR2A</i>                                            | Life technologies        | Hs00172187_m1              | 61                   |
| <i>TBP</i>                                               | Life technologies        | Hs00427621_m1              | 65                   |
| <i>TMBIM4</i>                                            | Life technologies        | Hs00211390_m1              | 63                   |
| <i>CXCL13</i>                                            | Life technologies        | Hs00757930_m1              | 70                   |
| SyBR Green Gene Expression Assays used for fresh samples |                          |                            |                      |
| Gene Name                                                | Company                  | Assay ID                   |                      |
| <i>TBX21</i>                                             | Qiagen                   | QT00042217                 |                      |
| <i>TMBIM4</i>                                            | Qiagen                   | QT00070329                 |                      |
| Primers used for fresh samples                           |                          |                            |                      |
| Gene                                                     | Forward                  | Reverse                    |                      |
| <i>BCL6</i>                                              | AGCAAGGCATTGGTGAAGACA    | ATGGCGGGTGAACTGGATAC       |                      |
| <i>CASC3</i>                                             | CAAGGAAGGTCGTGCTGGTT     | ACCAGACCGGCCACCAT          |                      |
| <i>CXCL13</i>                                            | GAGGCAGATGGAACCTGAGC     | CTGGGGATCTTCGAATGCTA       |                      |
| <i>FOXP3</i>                                             | CTGCCCCTAGTCATGGTGG      | CTGGAGGAGTGCCTGTAAGTG      |                      |
| <i>IFNG</i>                                              | GTTTTGGGTTCTCTTGGCTGTTA  | AAAAGAGTTCCATTATCCGCTACATC |                      |
| <i>IL10</i>                                              | GCTGGAGGACTTTAAGGGTTACCT | CTTGATGTCTGGGTCTTGTTCT     |                      |
| <i>IL21</i>                                              | CATGGAGAGGATTGTCATCTGTC  | CAGAAATTCAGGGACCAAGTCAT    |                      |
| <i>PDCD1</i>                                             | GCCTGGTGCTGCTAGTCTG      | GGCATACTCCGTCTGCTCAG       |                      |
| <i>SDHA</i>                                              | TGGGAACAAGAGGGCATCTG     | CCACCACTGCATCAAATTCATG     |                      |
| <i>TBP</i>                                               | TGCACAGGAGCCAAGAGTGAA    | CACATCACAGCTCCCCACCA       |                      |

### ***In vitro stimulation***

Total PBMC from 5 healthy controls were stimulated with plate-bound  $\alpha$ CD3/ $\alpha$ CD28 Ab (10  $\mu$ g/ml each) or Staphylococcal Enterotoxin B (SEB; 500 ng/ml) in X-VIVO 20 (Lonza) for 3-days before analysis by flow cytometry. An  $\alpha$ IL2 Ab (1  $\mu$ g/ml for  $\alpha$ CD3/ $\alpha$ CD28 and 10  $\mu$ g/ml for SEB stimulation conditions, respectively) or TGF $\beta$ 1 (5 ng/ml) were added at time zero. For IFN $\gamma$  detection, Brefeldin A (dose recommended by BD Biosciences) was added 4-hours before staining. Reagents are listed in the table below. Fresh BC tumor tissues were stimulated with SEB  $\pm$   $\alpha$ IL2 Ab for 18-hours in the presence of 0.5x dose of Brefeldin A before mechanical dissociation to obtain a single cell suspension for flow cytometric analysis. The tumor supernatant (SN) equals the initial 3 ml of X-VIVO 20 recovered after the first round of tumor tissue dissociation (ex vivo samples), which was subsequently clarified by centrifugation for 15 min at 13000 g (Gu-Trantien *et al.*, 2013). Frozen tonsil mononuclear cells ( $n = 3$ ) were briefly B cell-depleted using CD19 MicroBeads (Miltenyi Biotec) before treatment with tumor SN ( $n = 12$ ) or CXCL13 (10 ng/ml) for 24-hours.

| <b>Products used for in vitro stimulation experiments</b> |                 |                  |              |
|-----------------------------------------------------------|-----------------|------------------|--------------|
| <b>Product</b>                                            | <b>Company</b>  | <b>Reference</b> | <b>Clone</b> |
| $\alpha$ CD3                                              | eBioscience     | 16-0037          | OKT3         |
| $\alpha$ CD28                                             | BD Biosciences  | 555725           | CD28.2       |
| Staphylococcal enterotoxin B (SEB)                        | Sigma-Aldrich   | S4881            |              |
| $\alpha$ IL2                                              | R&D Systems     | MAB202           | 5334         |
| CD19 MicroBeads                                           | Miltenyi Biotec | 130-050-301      |              |
| CXCL13                                                    | R&D Systems     | 801-CX-025       |              |
| TGF $\beta$ 1                                             | R&D Systems     | 240-B            |              |
| Brefeldin A                                               | BD Biosciences  | 555029           |              |

### ***Public data analyses***

RNA sequencing expression data for 1058 BC patients (TCGA, 2012) were downloaded from the TCGA website (<https://tcga-data.nci.nih.gov/tcga/>) in July 2015. Expression intensities in RPKM were log-2 normalized before the data were used in the frequency plots. Pearson correlation coefficients for each gene with CXCL13 for the BC subtypes (determined using PAM50 gene signature) were estimated by linear regression analysis.

## **Statistics**

Statistical analysis (except for Cox analysis in Table S1) was performed using GraphPad Prism 6 software. *P* values for 2-group comparisons were generated using a 2-tailed student *t* test with unequal variance, either paired or unpaired depending upon the samples. One-way ANOVA was applied for multiple- (more than 2-) group comparisons, either matched or unmatched depending upon the samples. Tukey's or Sidak's tests were used for *P* value correction depending upon the comparisons performed across all or between side-by-side groups, respectively, within each data set. Data associated with the above analyses are represented as mean  $\pm$  SEM in all Figures except for paired representations. The linear regression method was used for most of the correlation analyses. When appropriate, nonlinear fits were applied to reach the best fit. *P* values were calculated using correlation coefficients and sample sizes. The log-rank (Mantel-Cox) test was used for calculating *P* values for the survival analyses. Multivariate Cox analysis was performed using R software. *P* values  $<0.05$  are considered significant. Degrees of significance:  $P<0.05$  (\*),  $P<0.01$  (\*\*),  $P<0.001$  (\*\*\*) and  $P<0.0001$  (\*\*\*\*).

### Supplemental References:

Bohnhorst JØ, *et al.* Bm1-Bm5 classification of peripheral blood B cells reveals circulating germinal center founder cells in healthy individuals and disturbance in the B cell subpopulations in patients with primary Sjögren's syndrome. *J Immunol.* 2001;167(7):3610-8.

Buisseret *et al.* Reliability of tumor infiltrating lymphocyte and tertiary lymphoid structure assessment in human breast cancer. *Mod Pathol*, *in press*.

Cancer Genome Atlas Network, *et al.* Comprehensive molecular portraits of human breast tumours. *Nature.* 2012;490(7418):61-70.

Dedeurwaerder S, *et al.* DNA methylation profiling reveals a predominant immune component in breast cancers. *EMBO Mol Med.* 2011;3(12):726-41.

Garaud S, *et al.* A simple and rapid protocol to non-enzymatically dissociate fresh human tissues for the analysis of infiltrating lymphocytes. *J Vis Exp.* 2014;(94).

Green CL, *et al.* B Cells in Health and Disease – Leveraging Flow Cytometry to Evaluate Disease Phenotype and the Impact of Treatment with immunomodulatory Therapeutics. In: Schmid I, eds. *Biochemistry, Genetics and Molecular Biology*. ISBN 978-953-51-0575-6. InTechOpen; 2012: 61-90.

Gu-Trantien C, *et al.* CD4<sup>+</sup> follicular helper T cell infiltration predicts breast cancer survival. *J Clin Invest.* 2013;123(7):2873-92.

Perez-Andres M, *et al.* Primary Health Care Group of Salamanca for the Study of MBL. Human peripheral blood B-cell compartments: a crossroad in B-cell traffic. *Cytometry B Clin Cytom.* 2010;78.

Zirakzadeh AA, *et al.* Multiplex B cell characterization in blood, lymph nodes, and tumors from patients with malignancies. *J Immunol.* 2013;190(11):5847-55.

---

## **Supplemental Figures**

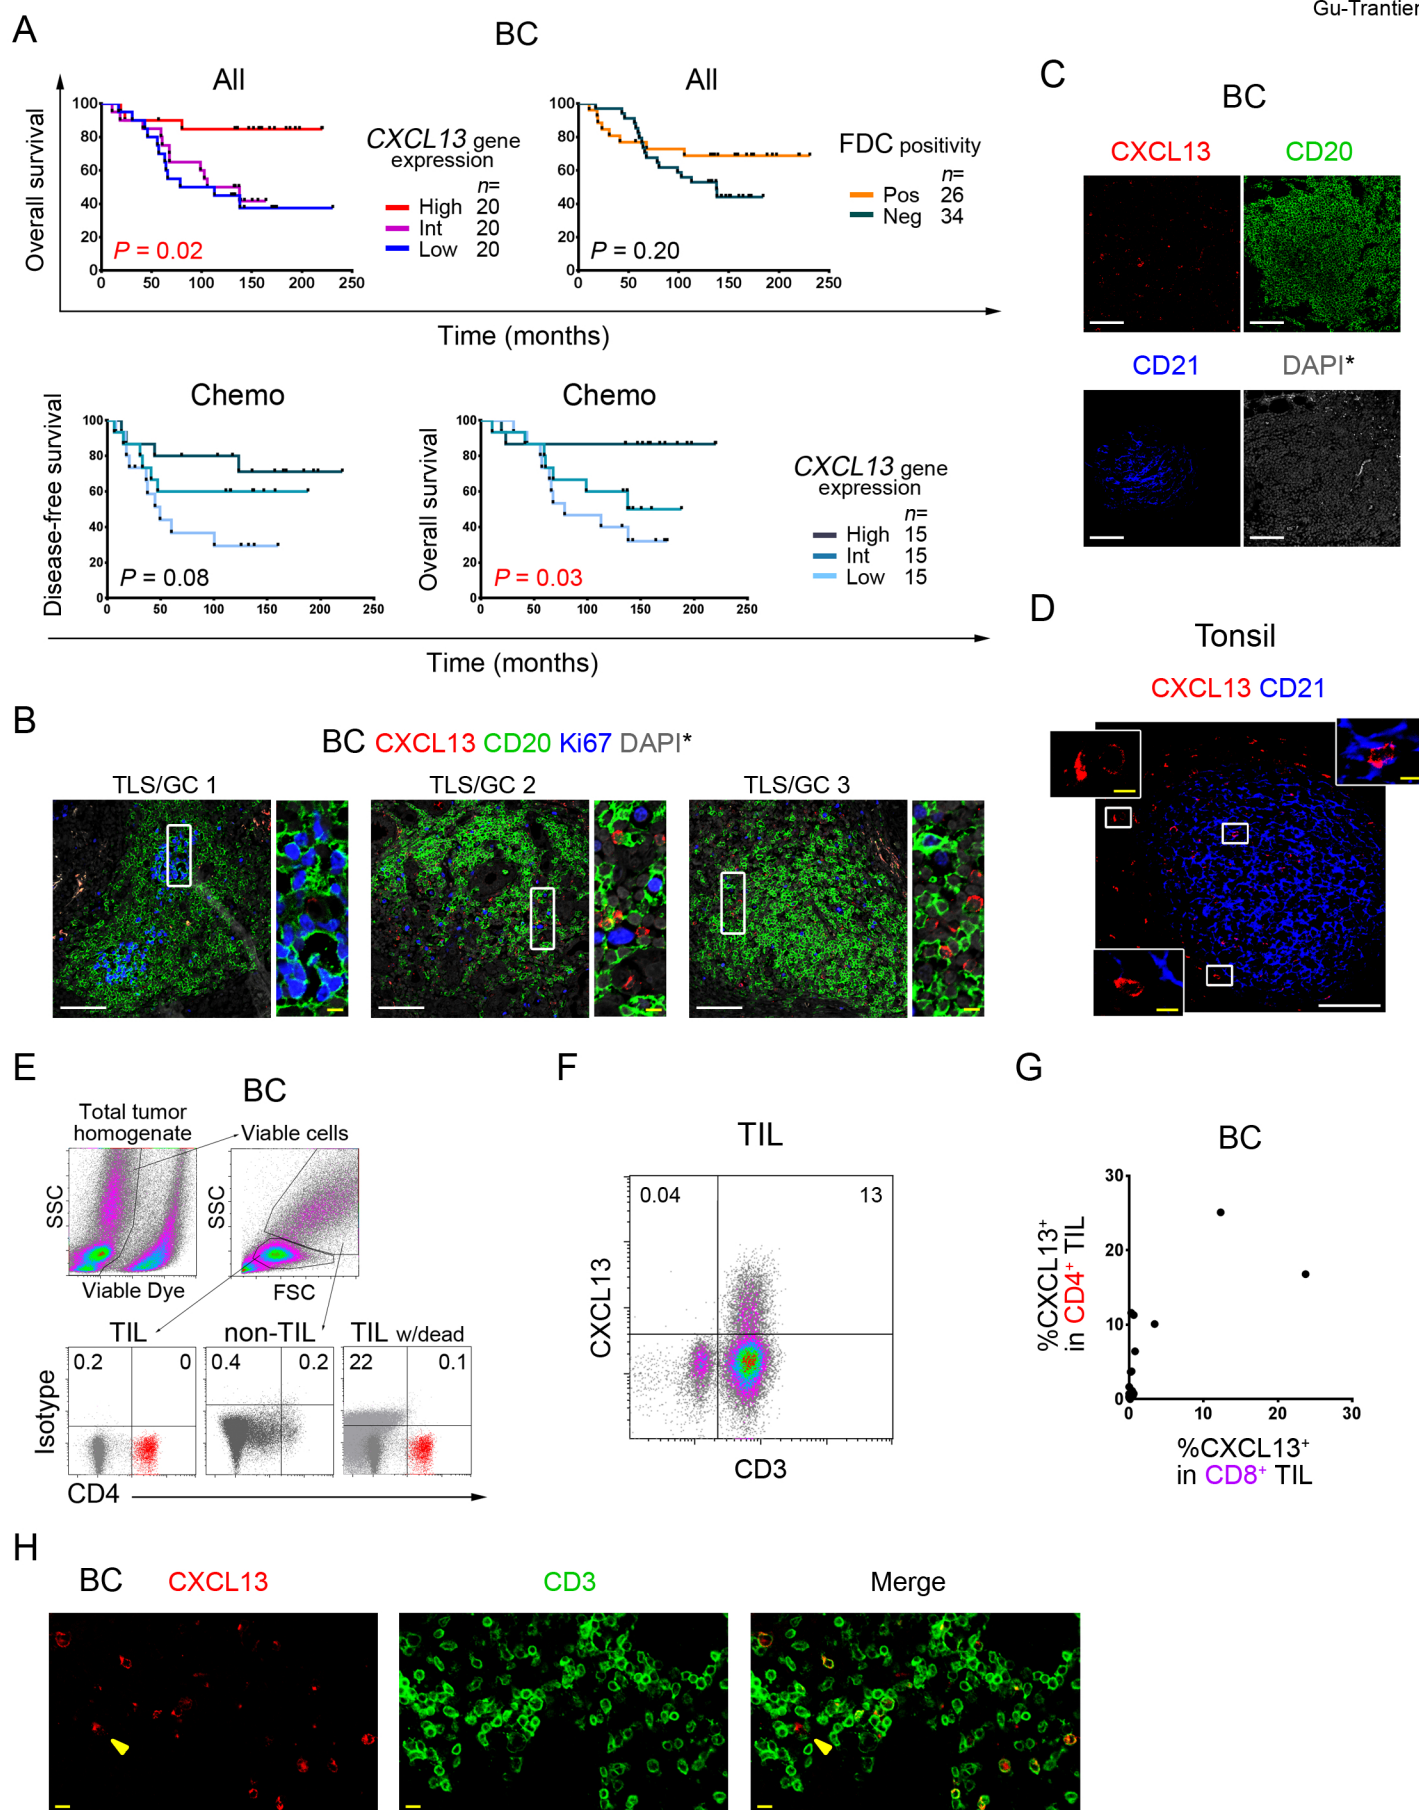

**Supplemental Figure 1 (Supporting data for Figure 1).**

(A) Kaplan-Meier analysis: (top) breast cancer (BC) overall survival rates stratified on *CXCL13* gene expression or follicular DC (FDC) positivity; (bottom) BC disease-free and overall survival rates stratified on *CXCL13* gene expression for the subgroup of patients receiving adjuvant chemotherapy. (B-D, H) Immunofluorescence (IF) staining of BC tissue sections; the zoomed areas are defined by white boxes. \*In some images, the contrast was enhanced by turning down DAPI (gray) intensity. White and yellow scale bars: 100  $\mu$ m and 10  $\mu$ m, respectively. (B) *CXCL13*<sup>+</sup> (red), *CD20*<sup>+</sup> (green) and *Ki67*<sup>+</sup> (blue) cells identify germinal centers (GC) containing proliferating (*Ki67*<sup>+</sup>) *CD20*<sup>+</sup> B- tumor-infiltrating lymphocytes (TIL) in the 3 tertiary lymphoid structures (TLS) shown in Figure 1B. (C) Single channel images for the complete TLS shown in Figure 1C. (D) *CXCL13*<sup>+</sup> (red) and *CD21*<sup>hi</sup> (blue) cells in a tonsil GC. (E) Gating strategies for flow cytometric analysis (*CD4*<sup>+</sup> BC TIL in red) and the control images for *CXCL13* staining shown in Figure 1D using an isotype control Ab. Low levels of nonspecific *CXCL13* control staining are detectable in the viable TIL gate on cells negative for TIL subpopulation markers (ex: *CD4*<sup>-</sup>). For this reason, samples with <1% *CXCL13*<sup>+</sup> cells in the viable TIL gate are considered to be *CXCL13*<sup>neg</sup>. This background was higher in the viable non-TIL gate and markedly increased without dead cell exclusion even in the TIL gate. (F) Staining of *CXCL13* in conjunction with the pan T cell marker *CD3* in the TIL gate. (G) Correlation plot showing % *CXCL13*<sup>+</sup> in *CD4*<sup>+</sup> and *CD8*<sup>+</sup> TIL. (H) IF staining of *CXCL13*<sup>+</sup> (red) and *CD3*<sup>+</sup> (green) TIL in BC tissues. The yellow arrow indicates infrequently detected *CXCL13*<sup>+</sup>*CD3*<sup>-</sup> TIL.

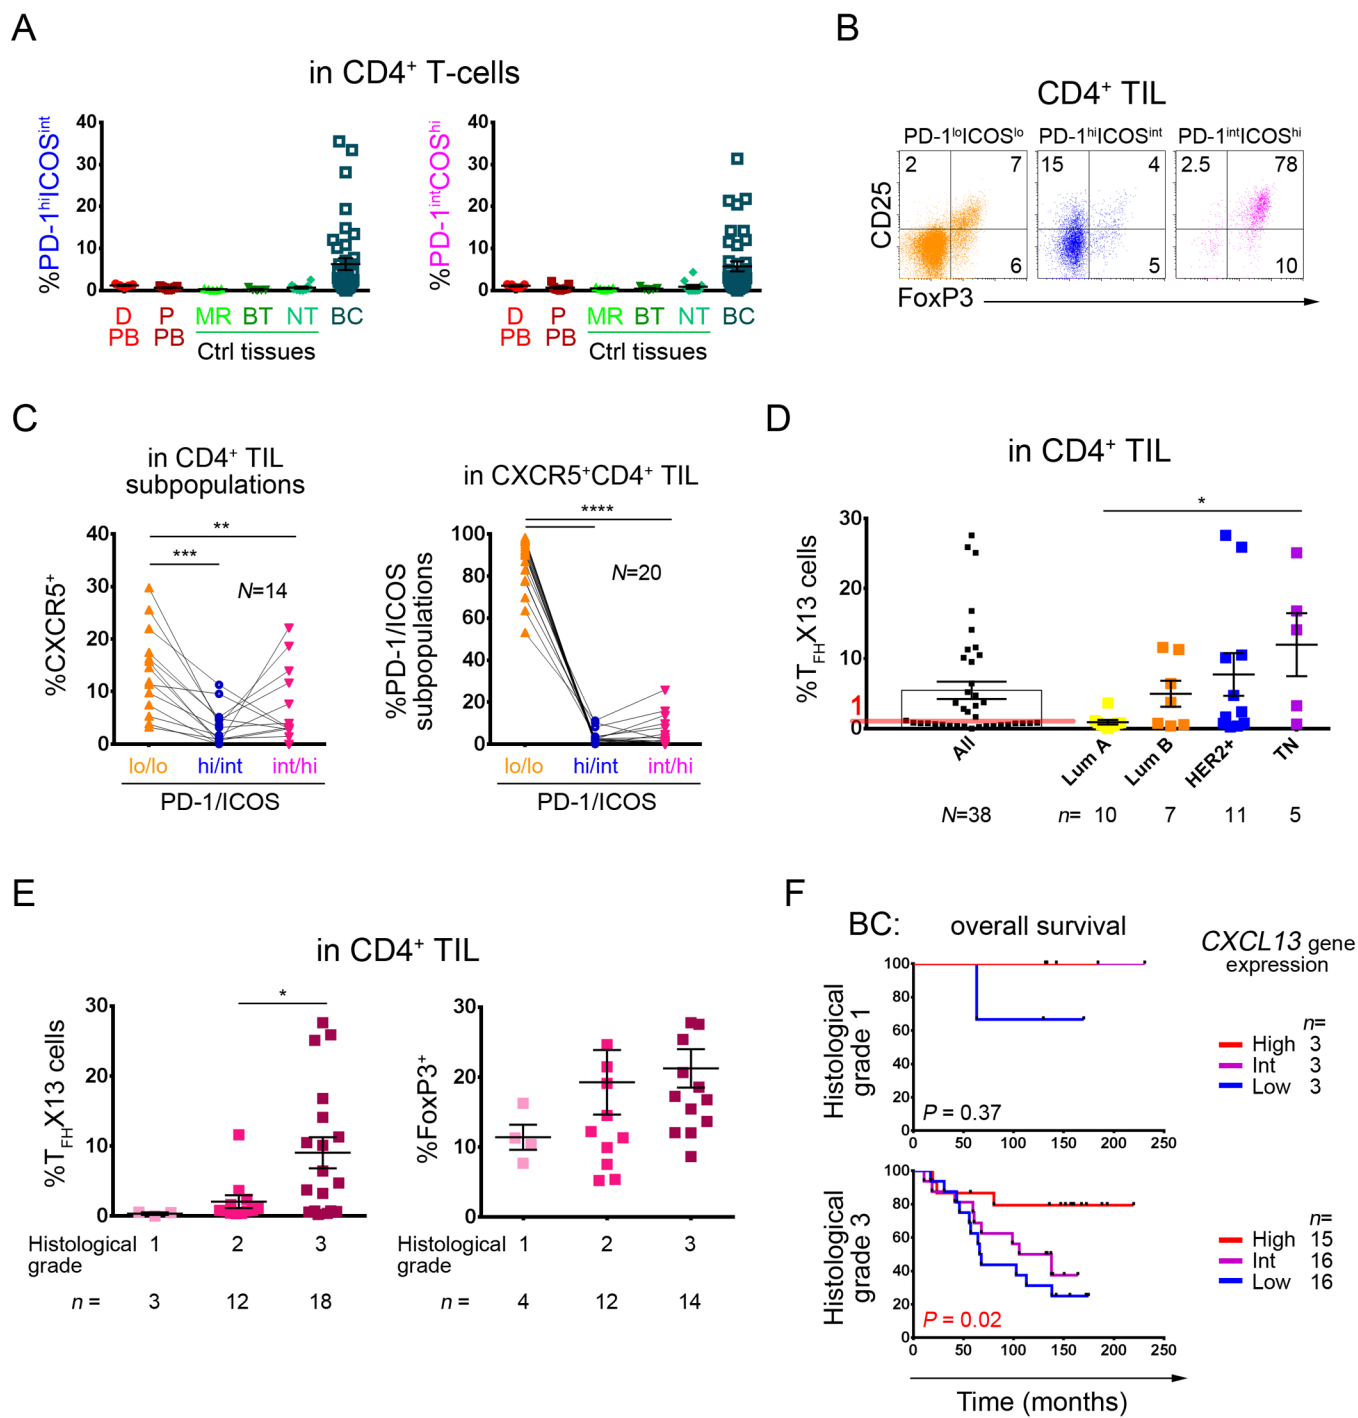

**Supplemental Figure 2 (Supporting data for Figure 2).**

(A) Percentage of PD-1<sup>hi</sup>ICOS<sup>int</sup> (left) and PD-1<sup>int</sup>ICOS<sup>hi</sup> (right) subpopulations in CD4<sup>+</sup> T cells from healthy donor peripheral blood (D-PB; *n* = 5), breast cancer (BC) patient PB (P-PB; *n* = 9), mammary reduction tissues (MR; *n* = 5), benign breast tumors (BT; *n* = 5), nonadjacent nontumor breast tissues from BC patients (NT; *n* = 10) and BC (*n* = 40). (B) Flow cytometry dot plots showing CD25 and FOXP3 expression patterns for the 3 PD-1/ICOS-defined CD4<sup>+</sup> tumor-infiltrating lymphocyte (TIL) subpopulations. (C) CXCR5 expression in PD-1/ICOS-defined CD4<sup>+</sup> TIL subpopulations: (left) % CXCR5<sup>+</sup> in each defined subpopulation; (right) % CXCR5<sup>+</sup>CD4<sup>+</sup> TIL that display a PD-1<sup>lo</sup>ICOS<sup>lo</sup>, PD-1<sup>hi</sup>ICOS<sup>int</sup> or PD-1<sup>int</sup>ICOS<sup>hi</sup> phenotype. (D) T<sub>FH</sub>X13 cell abundance (% CXCL13<sup>+</sup> in CD4<sup>+</sup> TIL) in BC (all or subtypes). BC (all) are also shown in Figure 2C. (E) Percentage of CXCL13<sup>+</sup> or FOXP3<sup>+</sup> in CD4<sup>+</sup> TIL stratified on histological tumor grade. (F) Kaplan-Meier analysis of BC overall survival rates for grade 1 and grade 3 tumors stratified on CXCL13 gene expression. (C-E) One-way ANOVA followed by Tukey's test. *P*<0.05 (\*), *P*<0.01 (\*\*), *P*<0.001 (\*\*\*) and *P*<0.0001 (\*\*\*\*).

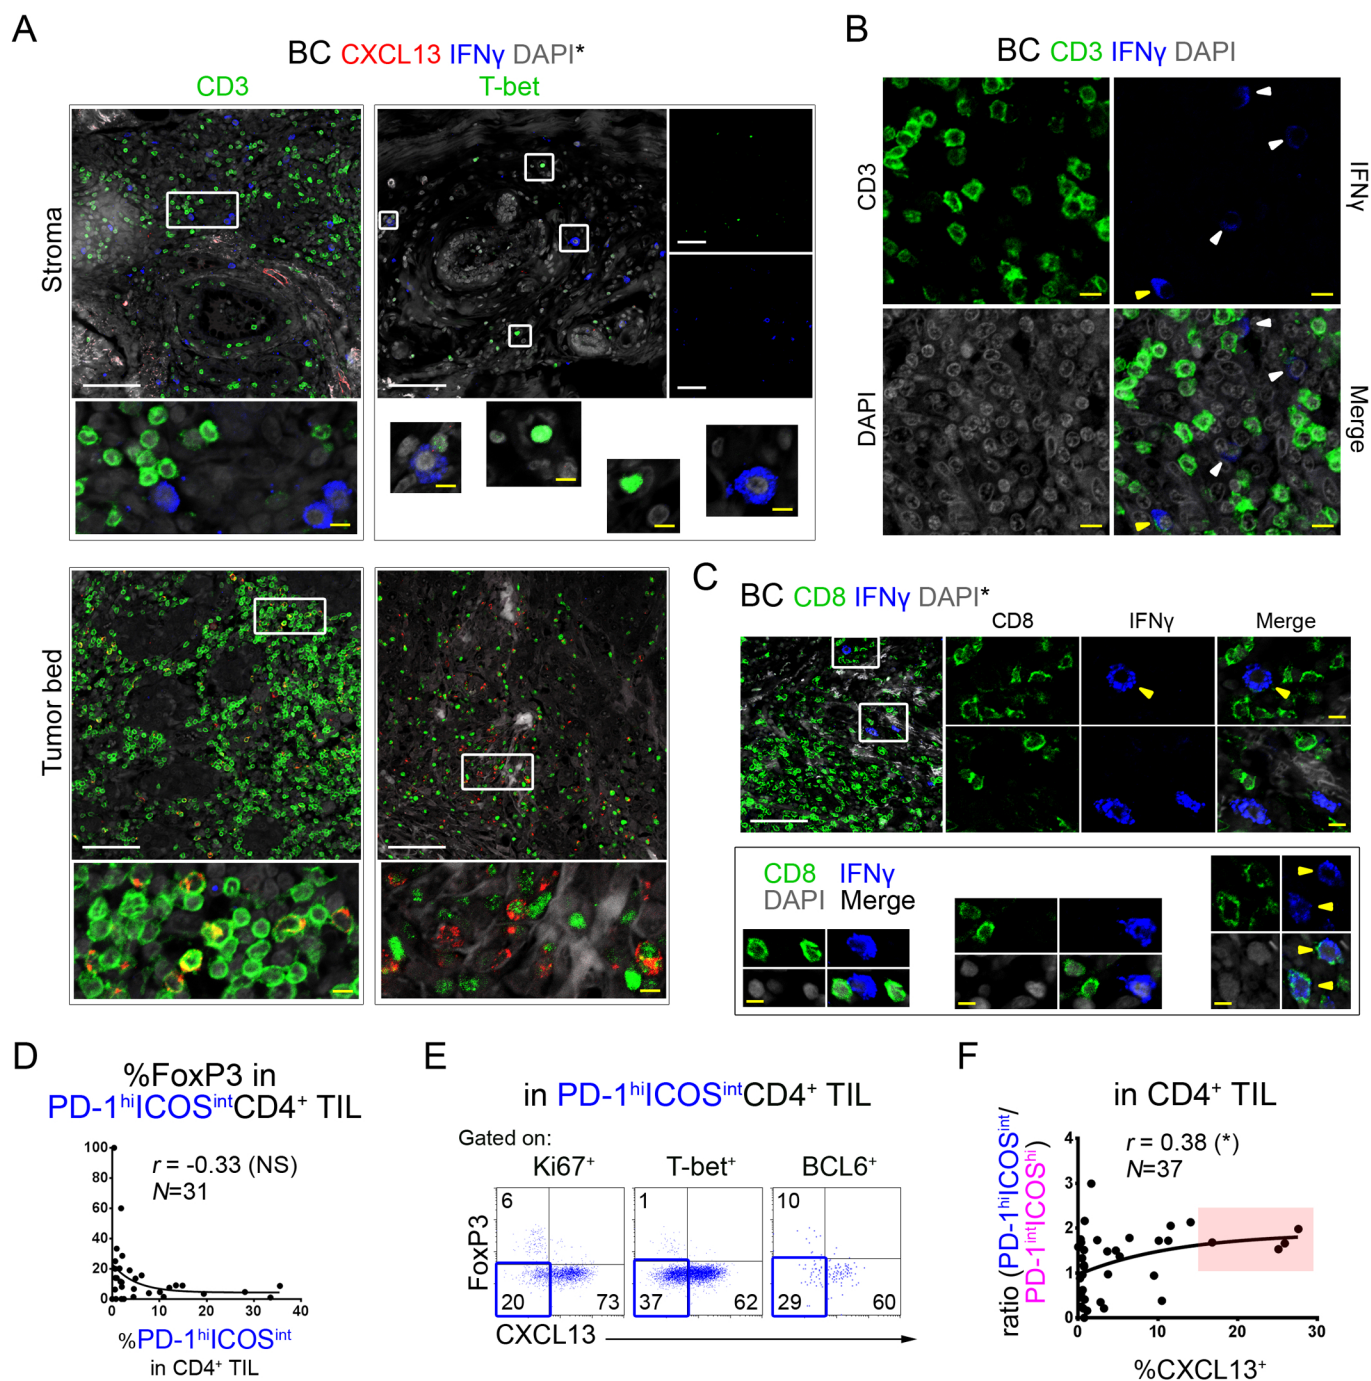

**Supplemental Figure 3 (Supporting data for Figure 3).**

(A-C) Immunofluorescence (IF) staining of breast cancer (BC) tissue sections; the zoomed areas are defined by white boxes. IFN $\gamma$ <sup>+</sup> (blue) (and CXCL13<sup>+</sup> [red] in A) with T-bet<sup>+</sup>, CD3<sup>+</sup> or CD8<sup>+</sup> (green) cells. \*In some images, the contrast was enhanced by turning down DAPI (gray) intensity. White and yellow scale bars: 100  $\mu$ m and 10  $\mu$ m, respectively. (B and C) White arrows indicate IFN $\gamma$ <sup>+</sup>CD3<sup>-</sup> non-T cells; yellow arrows point to the infrequently detected colocalization of IFN $\gamma$  with the T cell markers CD3 or CD8. (D) Correlation between PD-1<sup>hi</sup>ICOS<sup>int</sup> CD4<sup>+</sup> tumor-infiltrating lymphocytes (TIL; %) and % FOXP3<sup>+</sup> within this subpopulation. NS = non-significant. (E) FOXP3 and CXCL13 expression patterns in Ki67<sup>+</sup>, T-bet<sup>+</sup> or BCL6<sup>+</sup> PD-1<sup>hi</sup>ICOS<sup>int</sup>CD4<sup>+</sup> TIL. Blue frames indicate FOXP3<sup>-</sup>CXCL13<sup>-</sup> cells. (F) Correlation between cells (%) expressing CXCL13 and the PD-1<sup>hi</sup>ICOS<sup>int</sup>/PD-1<sup>int</sup>ICOS<sup>hi</sup> ratio within CD4<sup>+</sup> TIL. Red zone identifies high T<sub>FH</sub>X13 TIL levels where the PD-1<sup>hi</sup>ICOS<sup>int</sup>/PD-1<sup>int</sup>ICOS<sup>hi</sup> ratio is stable. (D and F)  $P < 0.05$  (\*),  $P < 0.01$  (\*\*),  $P < 0.001$  (\*\*\*) and  $P < 0.0001$  (\*\*\*\*).

A

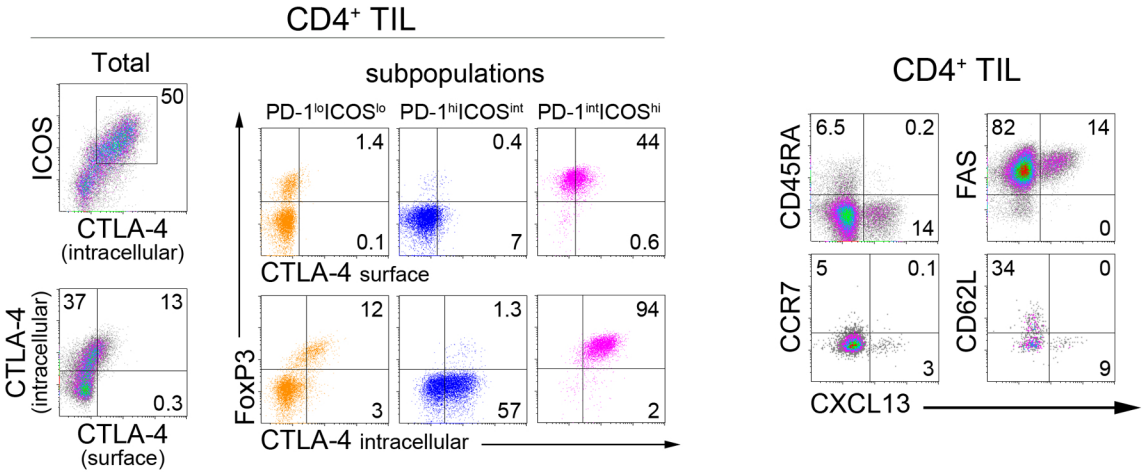

B

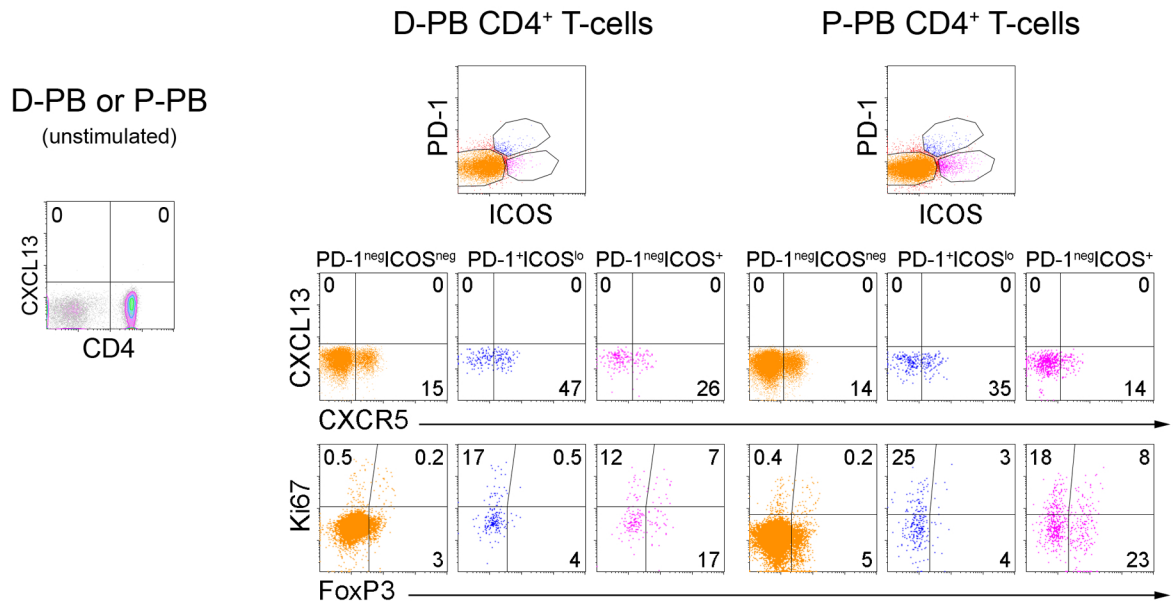

C

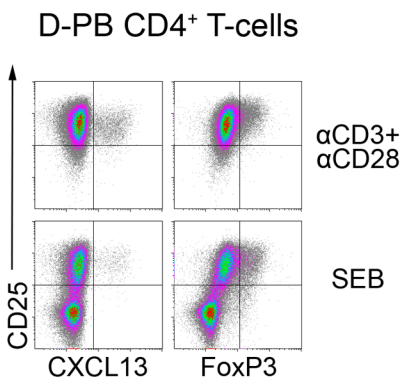

**Supplemental Figure 4 (Supporting data for Figure 4).**

(A)(Left) Intracellular and surface CTLA-4 expression in total and PD-1/ICOS-defined CD4<sup>+</sup> tumor-infiltrating lymphocyte (TIL) subpopulations. Surface ICOS and intracellular CTLA-4 are coexpressed in the majority of CD4<sup>+</sup> TIL; (right) expression of additional (in addition to Figure 4A) surface markers on CXCL13<sup>+</sup>CD4<sup>+</sup> TIL. (B)(Left) CXCL13 expression is not detected in unstimulated healthy donor (D-PB) and patient (P-PB) peripheral blood CD4<sup>+</sup> T cells; (right) expression of T<sub>FH</sub>/Treg markers CXCL13, CXCR5 and FOXP3 together with the proliferation marker Ki67 in PD-1/ICOS-defined D-PB and P-PB CD4<sup>+</sup> T cells. (C) CD25 expression on activated ( $\alpha$ CD3/ $\alpha$ CD28 Ab or Staphylococcal enterotoxin B [SEB]) D-PB CD4<sup>+</sup> T cells that express either CXCL13 or FOXP3.

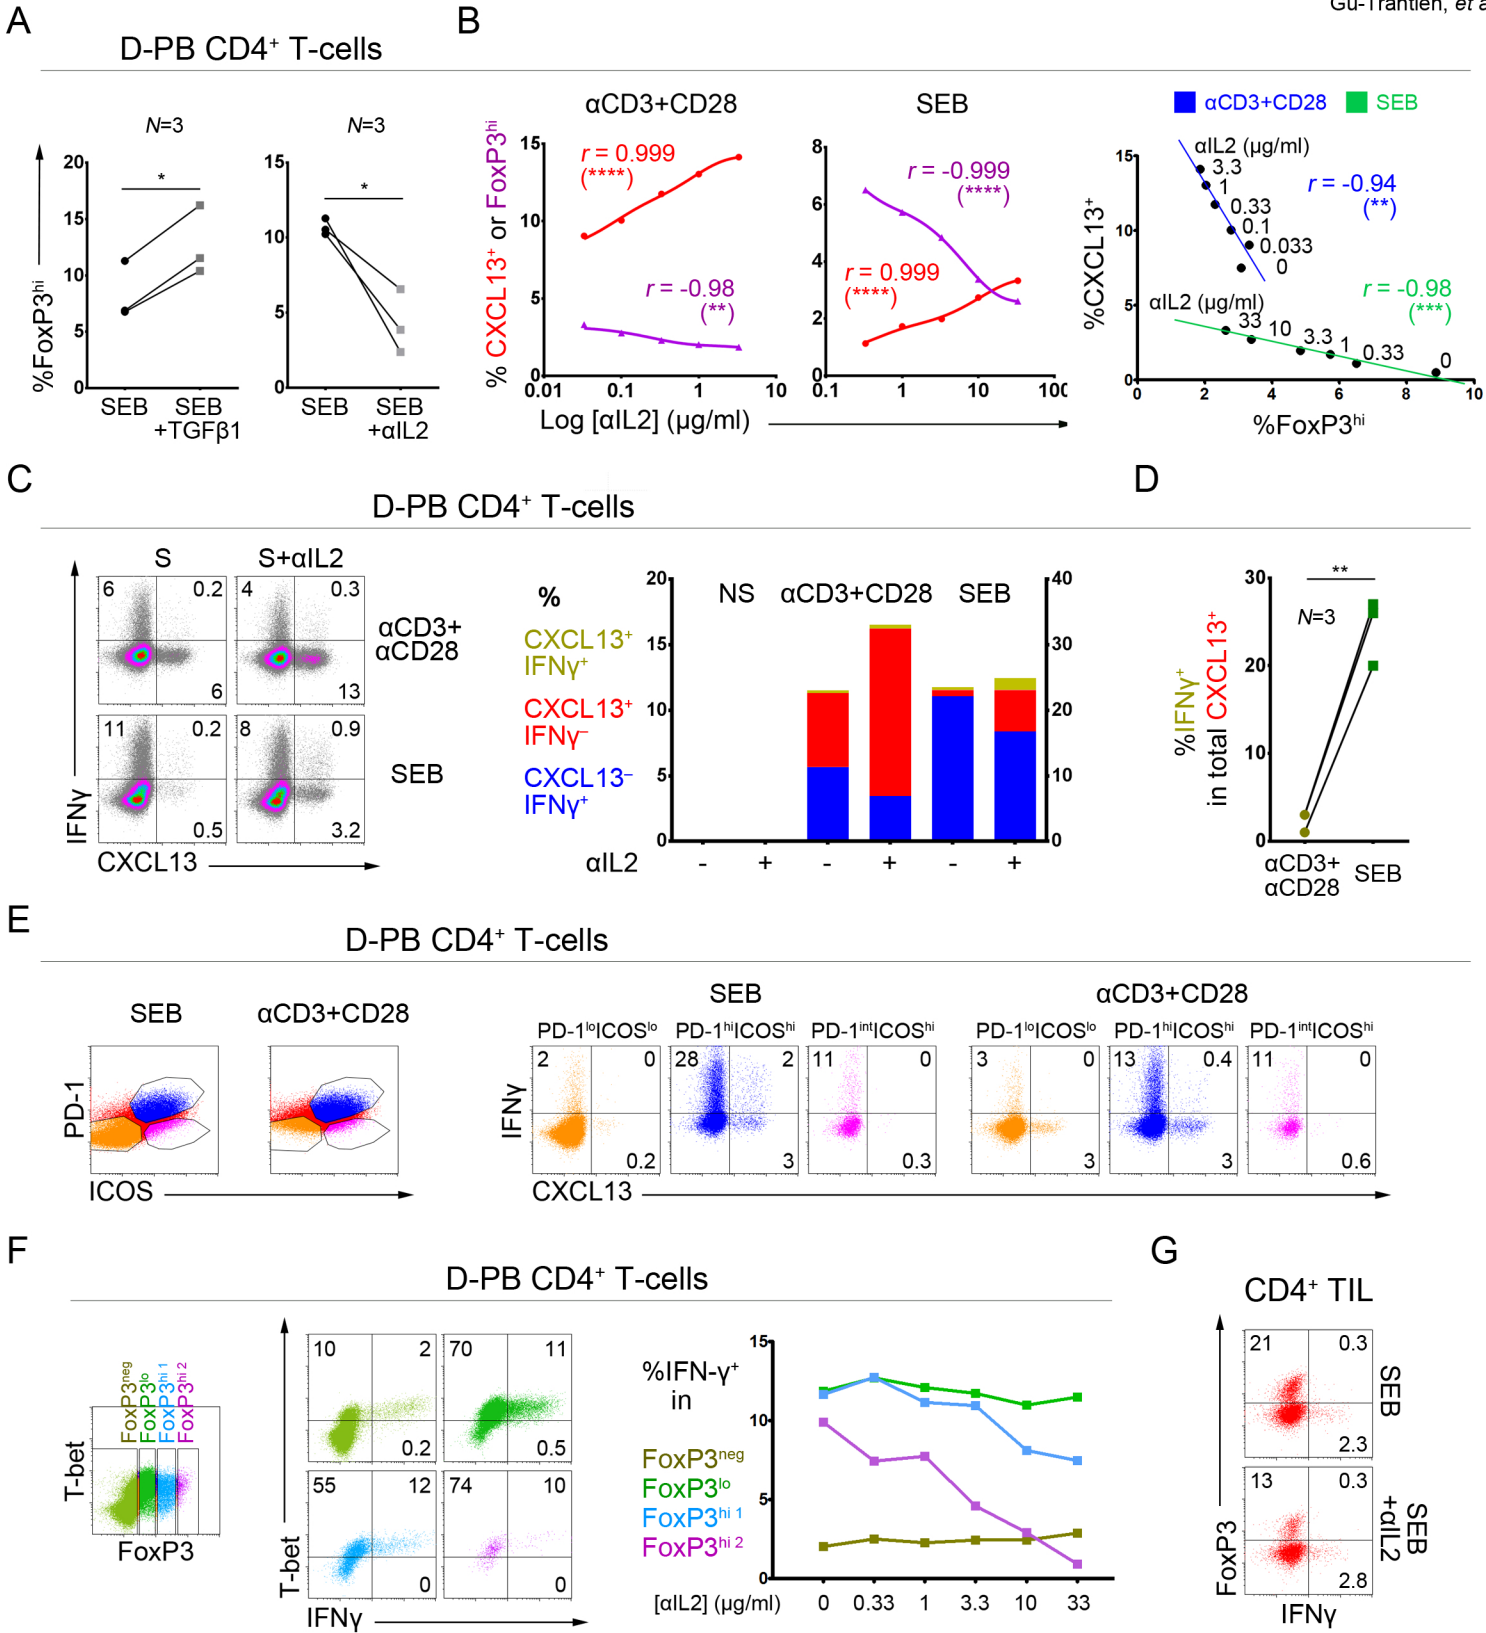

**Supplemental Figure 5 (Supporting data for Figure 5).**

(A) % FOXP3<sup>hi</sup> in Staphylococcal enterotoxin B (SEB)-stimulated healthy donor peripheral blood (D-PB) CD4<sup>+</sup> T cells: (left)  $\pm$  TGF $\beta$ 1; (right)  $\pm$   $\alpha$ IL2 blocking Ab. Data in the left and right panels are from independent experiments. (A and D) Paired 2-tailed student *t* test. (B) Correlation plots showing D-PB CD4<sup>+</sup> T cells (%) expressing CXCL13 or FOXP3<sup>hi</sup> after stimulation ( $\alpha$ CD3/ $\alpha$ CD28 Ab or SEB) with different concentrations of an  $\alpha$ IL2 Ab. (C)(dot plots) IFN $\gamma$  and CXCL13 expression in stimulated (S) D-PB CD4<sup>+</sup> T cells  $\pm$   $\alpha$ IL2 Ab; (graph) IFN $\gamma$  or CXCL13 single or double positive cells (%) in unstimulated (NS) and stimulated cells  $\pm$   $\alpha$ IL2 Ab (the latter shown in the dot plots). (A, C, G)  $\alpha$ IL2 Ab were used at 1  $\mu$ g/ml and 10  $\mu$ g/ml, respectively for  $\alpha$ CD3/ $\alpha$ CD28 Ab and SEB stimulation. (D) % IFN $\gamma$ <sup>+</sup> in CXCL13<sup>+</sup>CD4<sup>+</sup> T cells induced by stimulation with  $\alpha$ CD3/ $\alpha$ CD28 Ab or SEB. (E)(left) PD-1 and ICOS expression on stimulated D-PB CD4<sup>+</sup> T cells does not define distinct subpopulations corresponding to those in BC TIL; (right) IFN $\gamma$  and CXCL13 expression are enriched in the gate area of PD-1<sup>hi</sup>ICOS<sup>hi</sup> cells, which is most pronounced in the SEB-stimulated cells. (F)(dot plots)(left) Gating strategies defining 4 subpopulations with different intensities of FOXP3 expression after SEB stimulation of D-PB CD4<sup>+</sup> T cells and (middle) IFN $\gamma$  and T-bet expression in these subpopulations; (graph)(right) IFN $\gamma$  expression in the 4 FOXP3-defined subpopulations in relation to addition of increasing concentrations of  $\alpha$ IL2 Ab during stimulation. (G) IFN $\gamma$  and FOXP3 expression in SEB-stimulated CD4<sup>+</sup> tumor-infiltrating lymphocytes (TIL) ( $\pm$   $\alpha$ IL2 Ab) from a different BC than that shown in Figure 5F. (A, B, D)  $P < 0.05$  (\*),  $P < 0.01$  (\*\*),  $P < 0.001$  (\*\*\*) and  $P < 0.0001$  (\*\*\*\*).

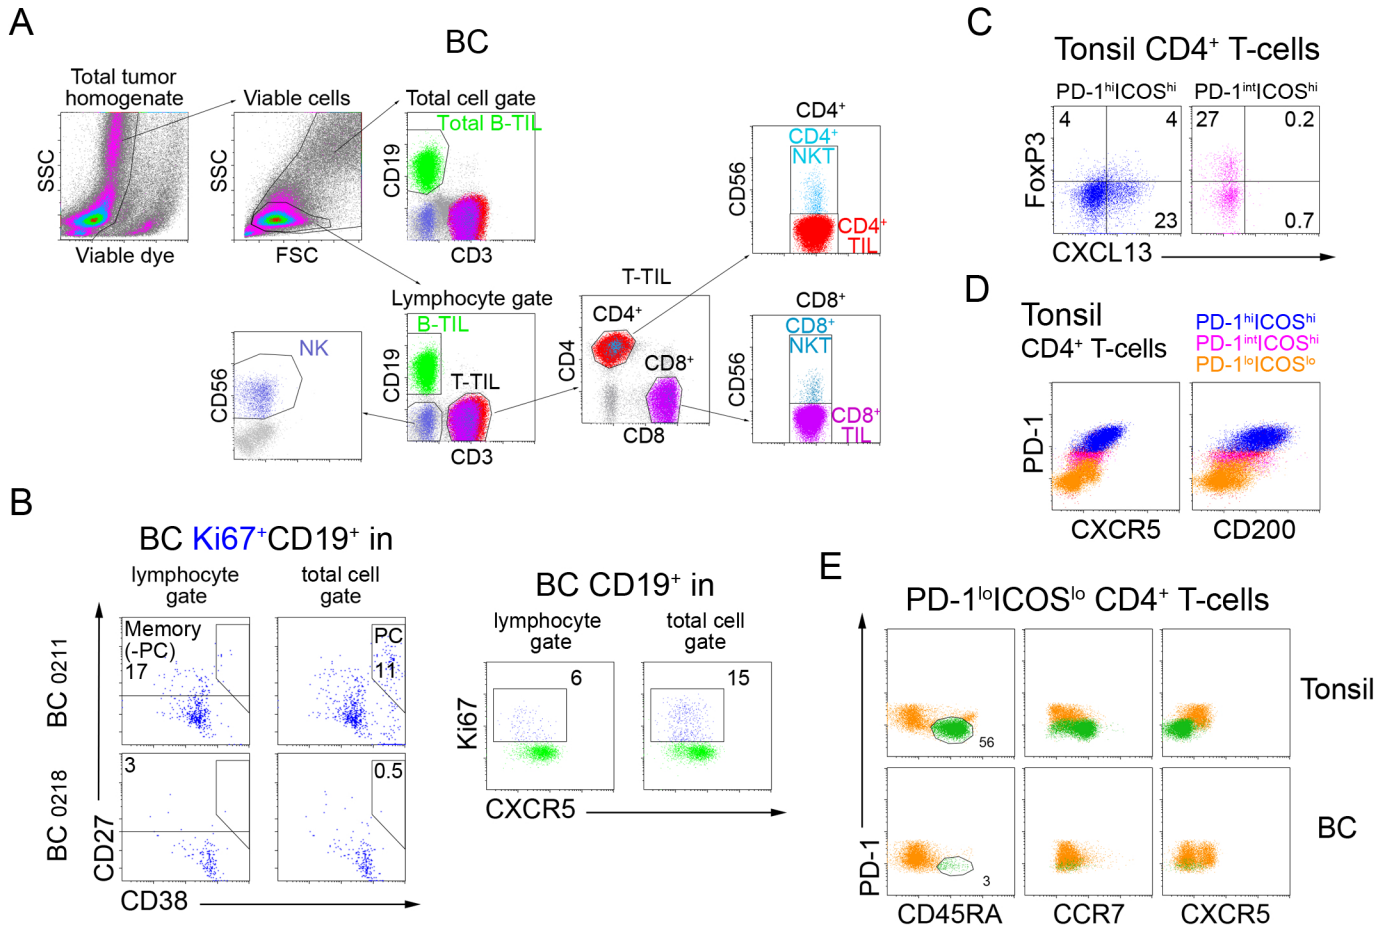

**Supplemental Figure 6 (Supporting data for Figure 6).**

(A) Flow cytometry gating strategies for defining lymphocyte subpopulations in the viable cell gate from breast cancer (BC) tumor homogenates. In some tumors, substantial numbers of CD19<sup>+</sup> B cells are detected both in the lymphocyte and the nonlymphocyte gates thus we defined “total B-TIL” (found in the viable total cell gate) and “B-TIL” (viable lymphocyte gate) for analysis of specific B cell subpopulations. TIL = tumor-infiltrating lymphocytes. (B)(left) Gating strategies used to define the 2 parameters used for the correlation analysis shown in Figure 6F (images from 2 additional tumors that are not shown in Figure 6D); (right) Ki67 and CXCR5 expression in B-TIL (lymphocyte gate) or total B-TIL (total cell gate). (C) FOXP3 and CXCL13 expression in tonsillar PD-1<sup>hi</sup>ICOS<sup>hi</sup> or PD-1<sup>int</sup>ICOS<sup>hi</sup> CD4<sup>+</sup> T cell subpopulations. (D) Expression patterns for PD-1, CXCR5 and CD200 in tonsillar CD4<sup>+</sup> T cell subpopulations. (E) PD-1<sup>-</sup>CD45RA<sup>+</sup>CCR7<sup>+</sup>CXCR5<sup>-</sup> naïve CD4<sup>+</sup> T cells are abundant in tonsils but rare in BC.

A

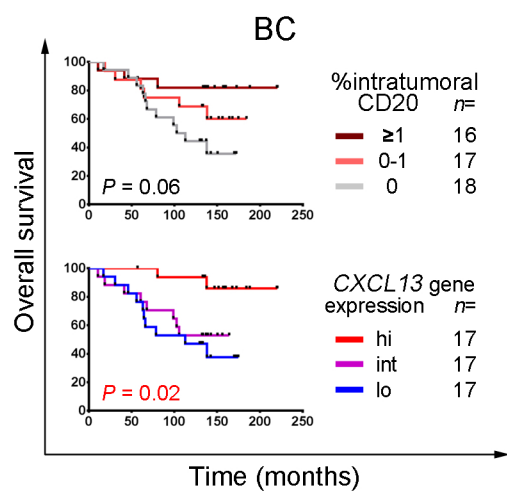

B

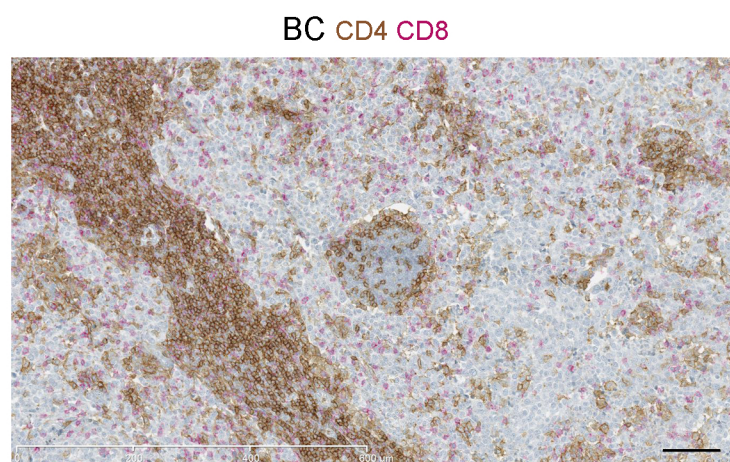

C

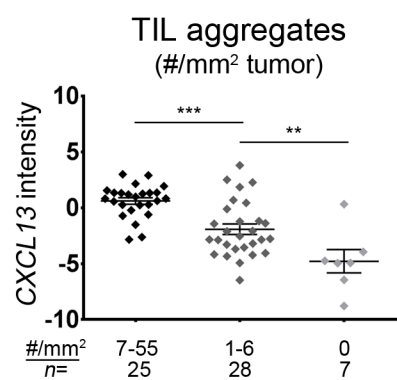

**Supplemental Figure 7 (Supporting data for Figure 7).**

(A) Kaplan-Meier analysis: (top) Breast cancer (BC) overall survival rates stratified on the percentage of intratumoral (apart from the more abundant stromal) CD20<sup>+</sup> B-tumor-infiltrating lymphocytes (TIL) (determined by IHC staining); (bottom) BC overall survival rates stratified on *CXCL13* gene expression are shown for comparison. (B) CD4<sup>+</sup> (brown) and CD8<sup>+</sup> (red) IHC staining of the tertiary lymphoid structure (TLS)-containing tumor bed shown in Figure 7F. Black scale bar: 100  $\mu$ m. (C) *CXCL13* gene expression in BC divided into 3 levels of lymphoid aggregate density (TIL aggregate number [#] scored on CD45 IHC-stained sections) per mm<sup>2</sup> tumor surface. One-way ANOVA followed by Sidak's test.  $P < 0.05$  (\*),  $P < 0.01$  (\*\*),  $P < 0.001$  (\*\*\*) and  $P < 0.0001$  (\*\*\*\*).
